# Supplementary material for: Genome-scale CRISPR-Cas9 screen identifies host factors as potential therapeutic targets for SARS-CoV-2 infection
Source: PubMed Central journal article supplement — iScience. 2024 Jul 8;27(8):110475. doi: 10.1016/j.isci.2024.110475 (PMC11295705; doi:10.1016/j.isci.2024.110475), 2024-07-08
Supplement: mmc1.pdf [file mmc1.pdf]

**Supplemental information**

**Genome-scale CRISPR-Cas9 screen  
identifies host factors as potential  
therapeutic targets for SARS-CoV-2 infection**

**Madoka Sakai, Yoshie Masuda, Yusuke Tarumoto, Naoyuki Aihara, Yugo Tsunoda, Michiko Iwata, Yumiko Kamiya, Ryo Komorizono, Takeshi Noda, Kosuke Yusa, Keizo Tomonaga, and Akiko Makino**

1 **Table S4. sgRNA sequences for CRISPR–Cas9 screening. Related to Figure 1**

| Gene   | sgRNA_ID      | sgRNA sequence       |
|--------|---------------|----------------------|
| DAXX   | DAXX_v3_6-3   | CCGGCGCCTTCGGGAAAAC  |
| DAXX   | DAXX_v3_6-4   | CCGACTCATGGCCAAACTC  |
| TRIM33 | TRIM33_v3_6-2 | ATGCTTCACCTGCCGGGAA  |
| TRIM33 | TRIM33_v3_6-4 | TTGCAGAGCCGGCGTGAGG  |
| EHMT1  | EHMT1_v3_6-4  | ACTCGGATAGCGAAAATG   |
| EHMT1  | EHMT1_v3_6-6  | CGCCGACGTCAAGGTCCAC  |
| EHMT2  | EHMT2_v3_6-2  | AAGAGGTGACCATCCCCCG  |
| EHMT2  | EHMT2_v3_6-4  | GATTGACCGCATCAGCGAG  |
| MED12  | MED12_v3_6-1  | TTGCGATGTCATTACCCT   |
| MED12  | MED12_v3_6-3  | GTA CTGCACGTGTCGTGGC |
| MED23  | MED23_v3_6-1  | CCAGGAGGTT CATAGGTAA |
| MED23  | MED23_v3_6-2  | ACAGCATTAGGTAGCTCAG  |
| VPS29  | VPS29_v3_7-1  | CTCTGCAACAGGGCTAAGC  |
| VPS29  | VPS29_v3_7-6  | ACTATCTCAAGACTCTGGC  |
| VPS35  | VPS35_v3_6-5  | CGAAGAAACAGACCCCTCA  |
| VPS35  | VPS35_v3_6-6  | CAAGGGATGTTGCACACCA  |
| NF2    | NF2_v3_9-1    | ACAGTGGCCTGGCTCAAAA  |
| NF2    | NF2_v3_9-7    | CCGGCACACCAAATCAAAG  |
| TRIM28 | TRIM28_v3_6-2 | TGGTTCGCATCCTGGGCGT  |
| TRIM28 | TRIM28_v3_6-3 | TACAGGCCGAGTGCAAACA  |

2

3

4 **Table S5. Primer sequences for RT-qPCR. Related to Figure 2, 3, and 6**

| Gene         | species              | Fw/Rv | Primer sequence         | Reference |
|--------------|----------------------|-------|-------------------------|-----------|
| ACE2         | homo sapiens         | Fw    | TGCAGACCAAAGCATCAAAG    | 20        |
|              |                      | Rv    | AATTAGCCACTCGCACATCC    |           |
| CXCL10       | homo sapiens         | Fw    | GTGGCATTCAAGGAGTACCTC   | 53        |
|              |                      | Rv    | GCCTTCGATTCTGGATTGAGACA |           |
| GAPDH        | homo sapiens         | Fw    | ATTTGGCTACAGCAACAGGGT   | 54        |
|              |                      | Rv    | AACTGTGAGGGGAGATTCAGTG  |           |
| IFNB1        | homo sapiens         | Fw    | AAACTCATGAGCAGTCTGCA    | 55        |
|              |                      | Rv    | AGGAGATCTTCAGTTTCGGAGG  |           |
| IL-6         | homo sapiens         | Fw    | CCTGAACCTTCCAAAGATGGC   | 56        |
|              |                      | Rv    | TTCACCAGGCAAGTCTCCTCA   |           |
| TNF $\alpha$ | homo sapiens         | Fw    | ATGAGCACTGAAAGCATGATCC  | 53        |
|              |                      | Rv    | GAGGGCTGATTAGAGAGAGGTC  |           |
| ACE2         | Mesocricetus auratus | Fw    | GAAGAGGCTGTCAGGTTGTC    | 57        |
|              |                      | Rv    | TGCCAACCACTACAATTCCC    |           |
| IL-6         | Mesocricetus auratus | Fw    | CCTGGCTGTATGGACAATGACT  |           |
|              |                      | Rv    | AGTCCAGAAGACCAGAGGTGA   |           |
| RPL18        | Mesocricetus auratus | Fw    | GTTTATGAGTCGCACTAACCG   | 58        |
|              |                      | Rv    | TGTTCTCTCGGCCAGGAA      |           |
| TMPRSS2      | Mesocricetus auratus | Fw    | ATGGAGTGCATGTCTTCAGGC   |           |
|              |                      | Rv    | GGAGCTGTGATCAGTGTGGTG   |           |
| TNF $\alpha$ | Mesocricetus auratus | Fw    | CTGAACTTCGGGGTGATCGG    | 59        |
|              |                      | Rv    | TGAGAGACATGCCGTTGGC     |           |

5

6

7 **Supplementary Figures**

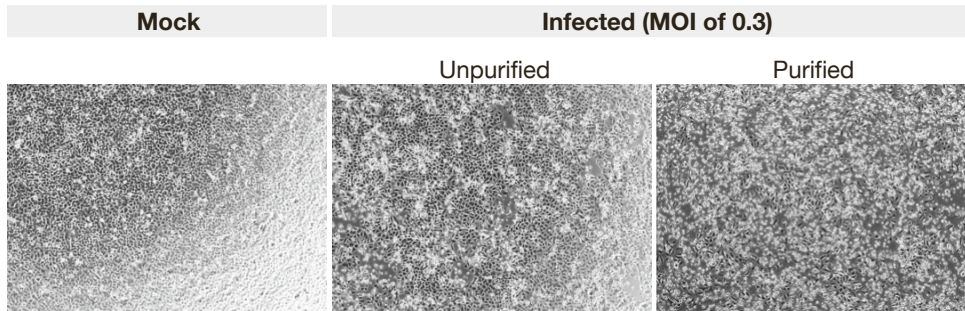

8

9 **Fig. S1. Cytopathic effects induced by infection with purified and unpurified SARS-CoV-2.**

10 **Related to Figure 1**

11 Representative microscopic images of A549-hACE2 cells infected with SARS-CoV-2 that was  
12 either unpurified or purified via ultracentrifugation. Images were captured 3 days post-infection to  
13 illustrate the cytopathic effects in the cells.

a

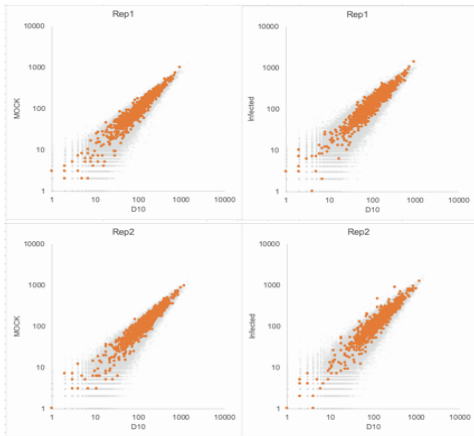

b

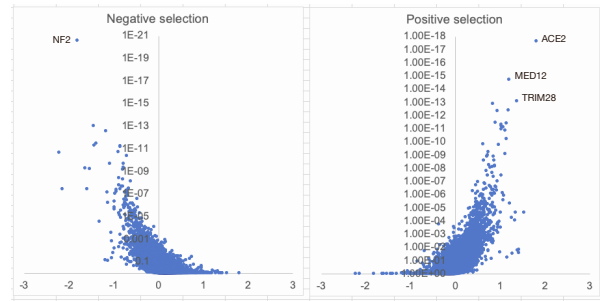

14  
15  
16  
17  
18  
19

**Fig. S2. CRISPR-Cas9 screening data analysis. Related to Figure 1**

(a) Scatterplot of gRNA counts in gCTRL (n=1004, highlighted in orange) cells to confirm the quality of screening. Comparison between preinfection versus mock and preinfection versus infected. (b) Volcano plot of gRNA change compared between mock and infected cells.

a

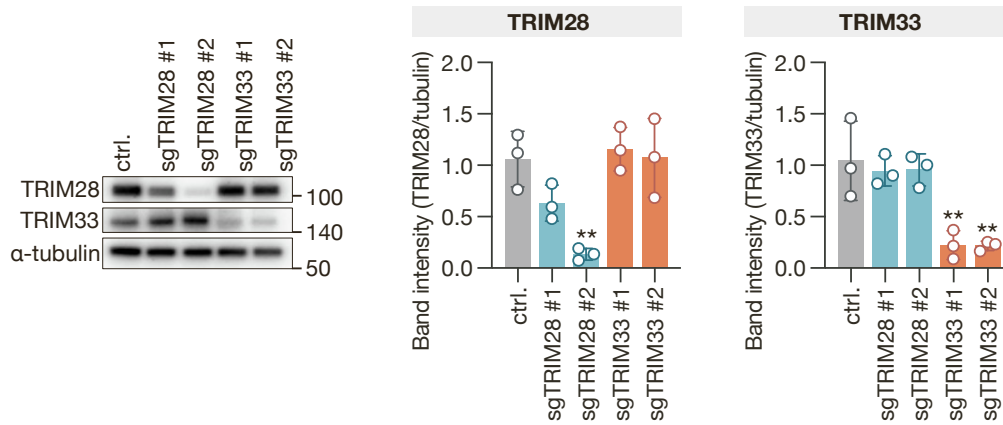

b

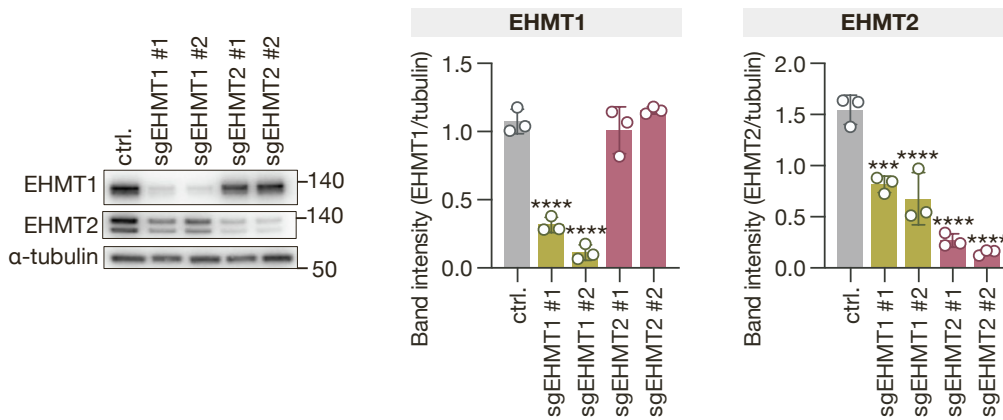

20

21 **Fig. S3. Knockout efficiency of selected genes in A549-Cas9 cells. Related to Figure 2**

22 **(a)(b)** Western blotting analysis of selected genes, TRIM28 and TRIM33 (a) and EHMT1 and  
 23 EHMT2 (b). The expression levels were evaluated by the band intensity, which was normalized to  
 24 that of  $\alpha$ -tubulin. Data are presented as the mean  $\pm$  the SD of three independent experiments.  
 25 Dunnett's multiple-comparison test. \*\*,  $p < 0.01$ ; \*\*\*,  $p < 0.001$ ; \*\*\*\*,  $p < 0.0001$ .

a

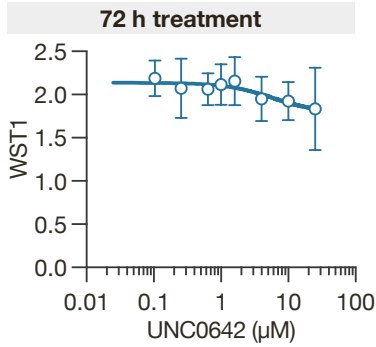

b

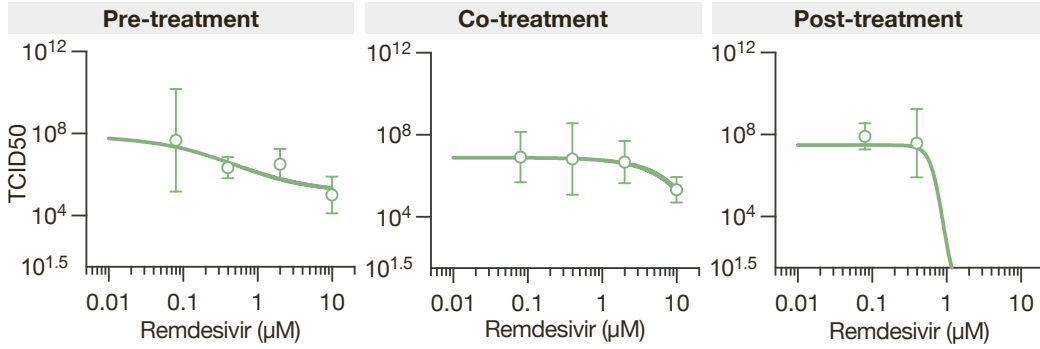

c

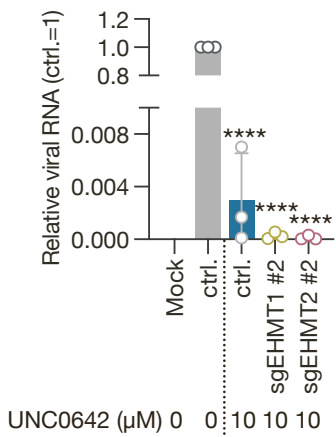

26

27

**Fig. S4. Evaluation of UNC0642 cytotoxicity and the antiviral effects of remdesivir on SARS-**

28

**CoV-2. Related to Figure 5**

29

**(a)** Cytotoxicity of UNC0642 was assessed by monitoring cell proliferation using a WST-1 assay

30

(TaKaRa). This assay measures the cell viability and proliferation, providing insights into the

31 potential toxic effects of UNC0642 on A549-hACE2 cells. **(b)** The inhibitory effect of remdesivir on  
32 SARS-CoV-2 infection was evaluated under different treatment conditions: pre-treatment (1 hour  
33 before virus inoculation), co-treatment (during 1 hour virus absorption), and post-treatment (after  
34 inoculation). These conditions were designed to assess the effectiveness of remdesivir at various  
35 stages of viral infection. Statistical analysis was performed using Dunnett's multiple-comparison  
36 test; however, no significant differences were observed under any of the treatment conditions. (c)  
37 qPCR analysis of viral RNA in EHMT1, or EHMT2 knockout cells treated post-infection with 10  $\mu$ M  
38 UNC0642 for 3 days. The cells were inoculated at an MOI of. 0.001. Data are presented as the  
39 mean  $\pm$  SD of three independent experiments. Statistical analysis was performed using Dunnett's  
40 multiple-comparison test. \*\*\*\*,  $p < 0.0001$ .

41



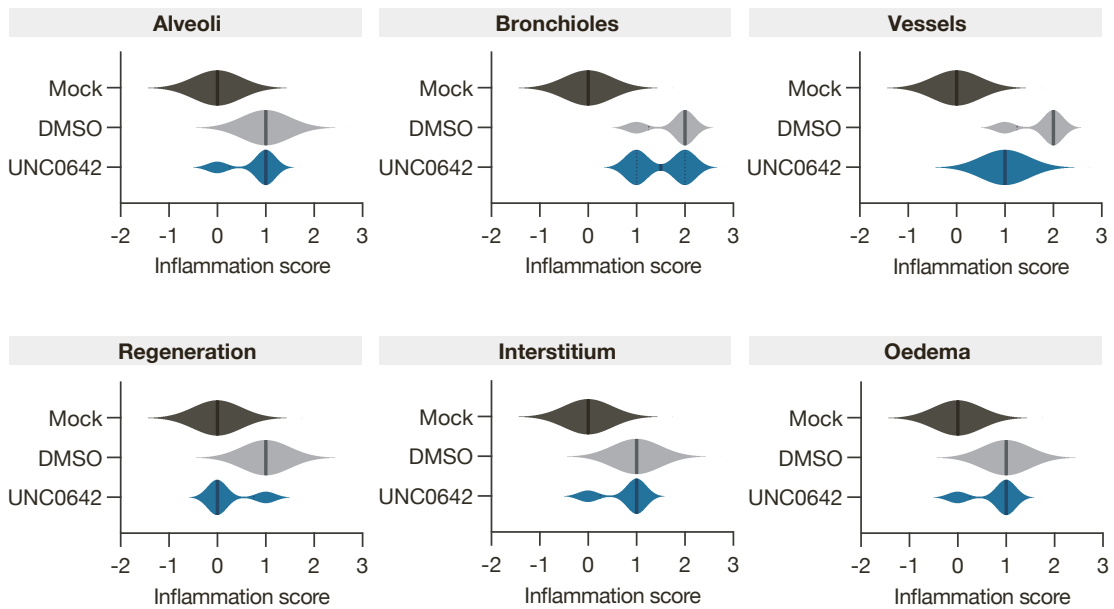

42

43 **Fig. S5. Pathological scoring of various tissue responses in hamster lungs post SARS-CoV-**  
 44 **2 infection. Related to Figure 6**

45 This figure presents a violin plot illustrating the distribution and intensity of inflammation scores in  
 46 the lungs of hamsters, assessed 4 days post-infection with SARS-CoV-2. The scores encompass  
 47 a range of pathological features including changes in the airways, interstitial spaces, blood vessels,  
 48 and alveolar structures, as well as the presence of oedema and signs of alveolar epithelial  
 49 regeneration.

50
